# Supplementary material for: Interplay between mitochondria and diet mediates pathogen and stress resistance in Caenorhabditis elegans
Source: PubMed Central journal article supplement (PMC6415812; doi:10.1371/journal.pgen.1008011), 2019-03-13
Supplement: pgen.1008011.s005.pdf [file pgen.1008011.s005.pdf]

A

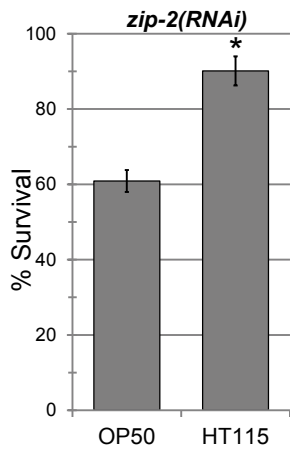

B

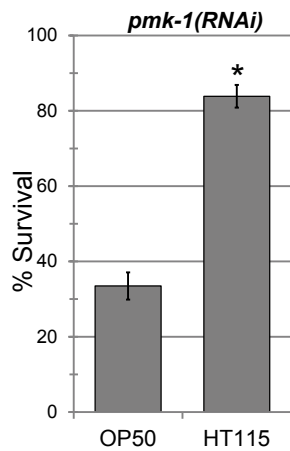

C

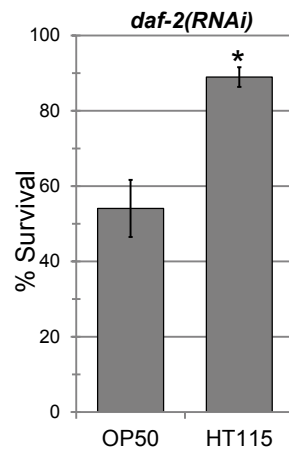

D

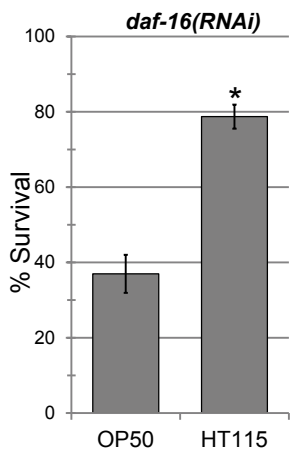

E

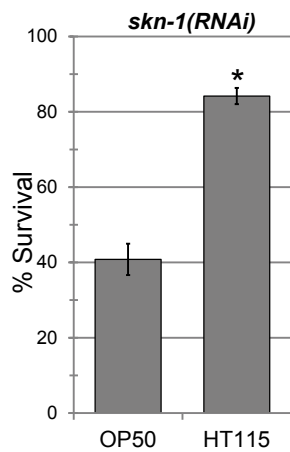

Figure S5
